# Supplementary material for: A novel non-template solution approach to fabricate ZnO hollow spheres with a coordination polymer as a reactantElectronic supplementary information (ESI) available: X-ray photoelectron spectra and energy-dispersive X-ray analysis of the products. See http://www.rsc.org/suppdata/nj/b3/b304787c/
Source: Royal Society of Chemistry journal article supplement (doi:10.1039/b304787c), 2003-01-01
Supplement: b304787c.doc [file b304787c.doc]

## Supplementary information

Further evidence for the quality and composition of the as-obtained products were obtained by the X-ray photoelectron spectra (XPS) of the products, which were collected on an ESCALab MKII X-ray photoelectron spectrometer, using nonmonochromatized Mg-K X-ray as the excitation source. The binding energies obtained in the XPS analysis were corrected for specimen charging by referencing the C 1s to 284.60 eV. Fig. 1 shows XPS spectra taken from the Zn and O regions of the ZnO hollow spheres. In Fig. 1A, there is a strong peak at about 1022 eV, which is attributed to Zn2p3/2. In Fig. 1B, we can see that the O1s XPS is asymmetric, indicating that two oxygen species are present in the nearby region. The peak at about 531 eV can be indexed to the O(-2) in the ZnO, whereas the weaker shoulder peak at about 532 eV is due to chemisorbed oxygen caused by surface hydroxyl, which corresponds to O-H bonds. No obvious peaks for other elemental or impurities were observed. The atomic composition of Zn and O was calculated by using the integrated peak area and sensitivity factors, the atomic ratio of Zn:O is 1:1.10, close to the composition of ZnO.


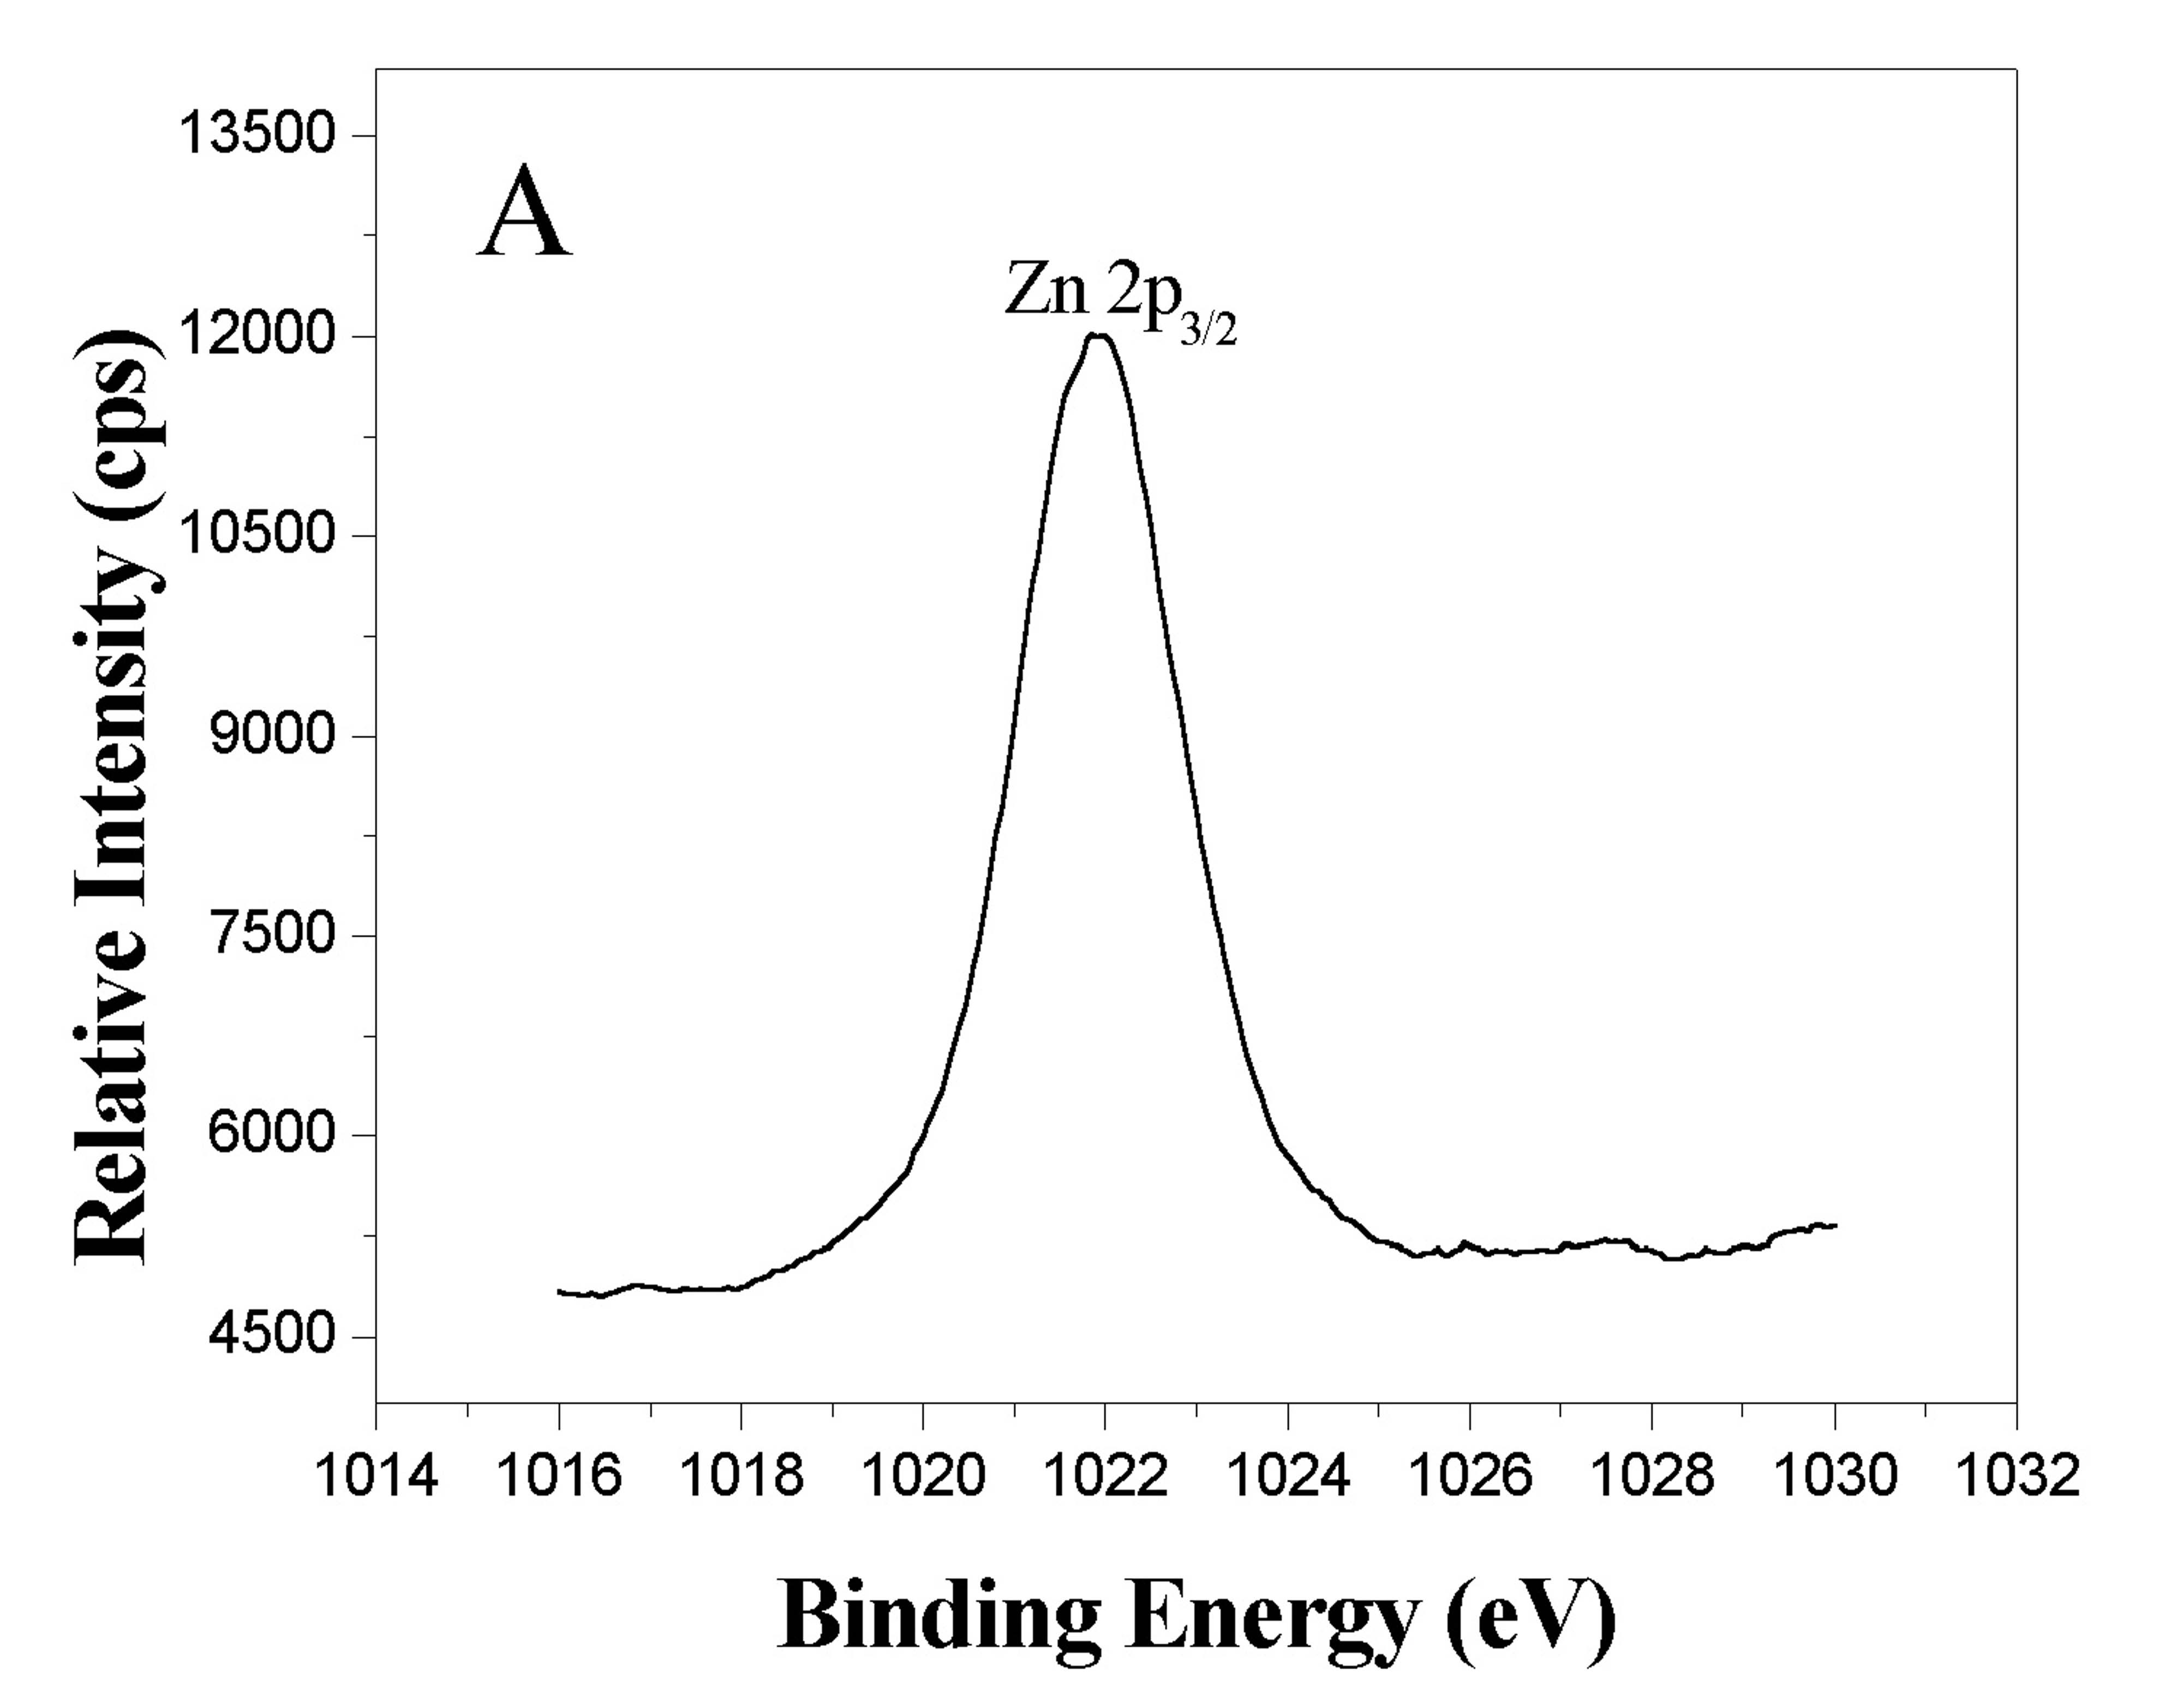

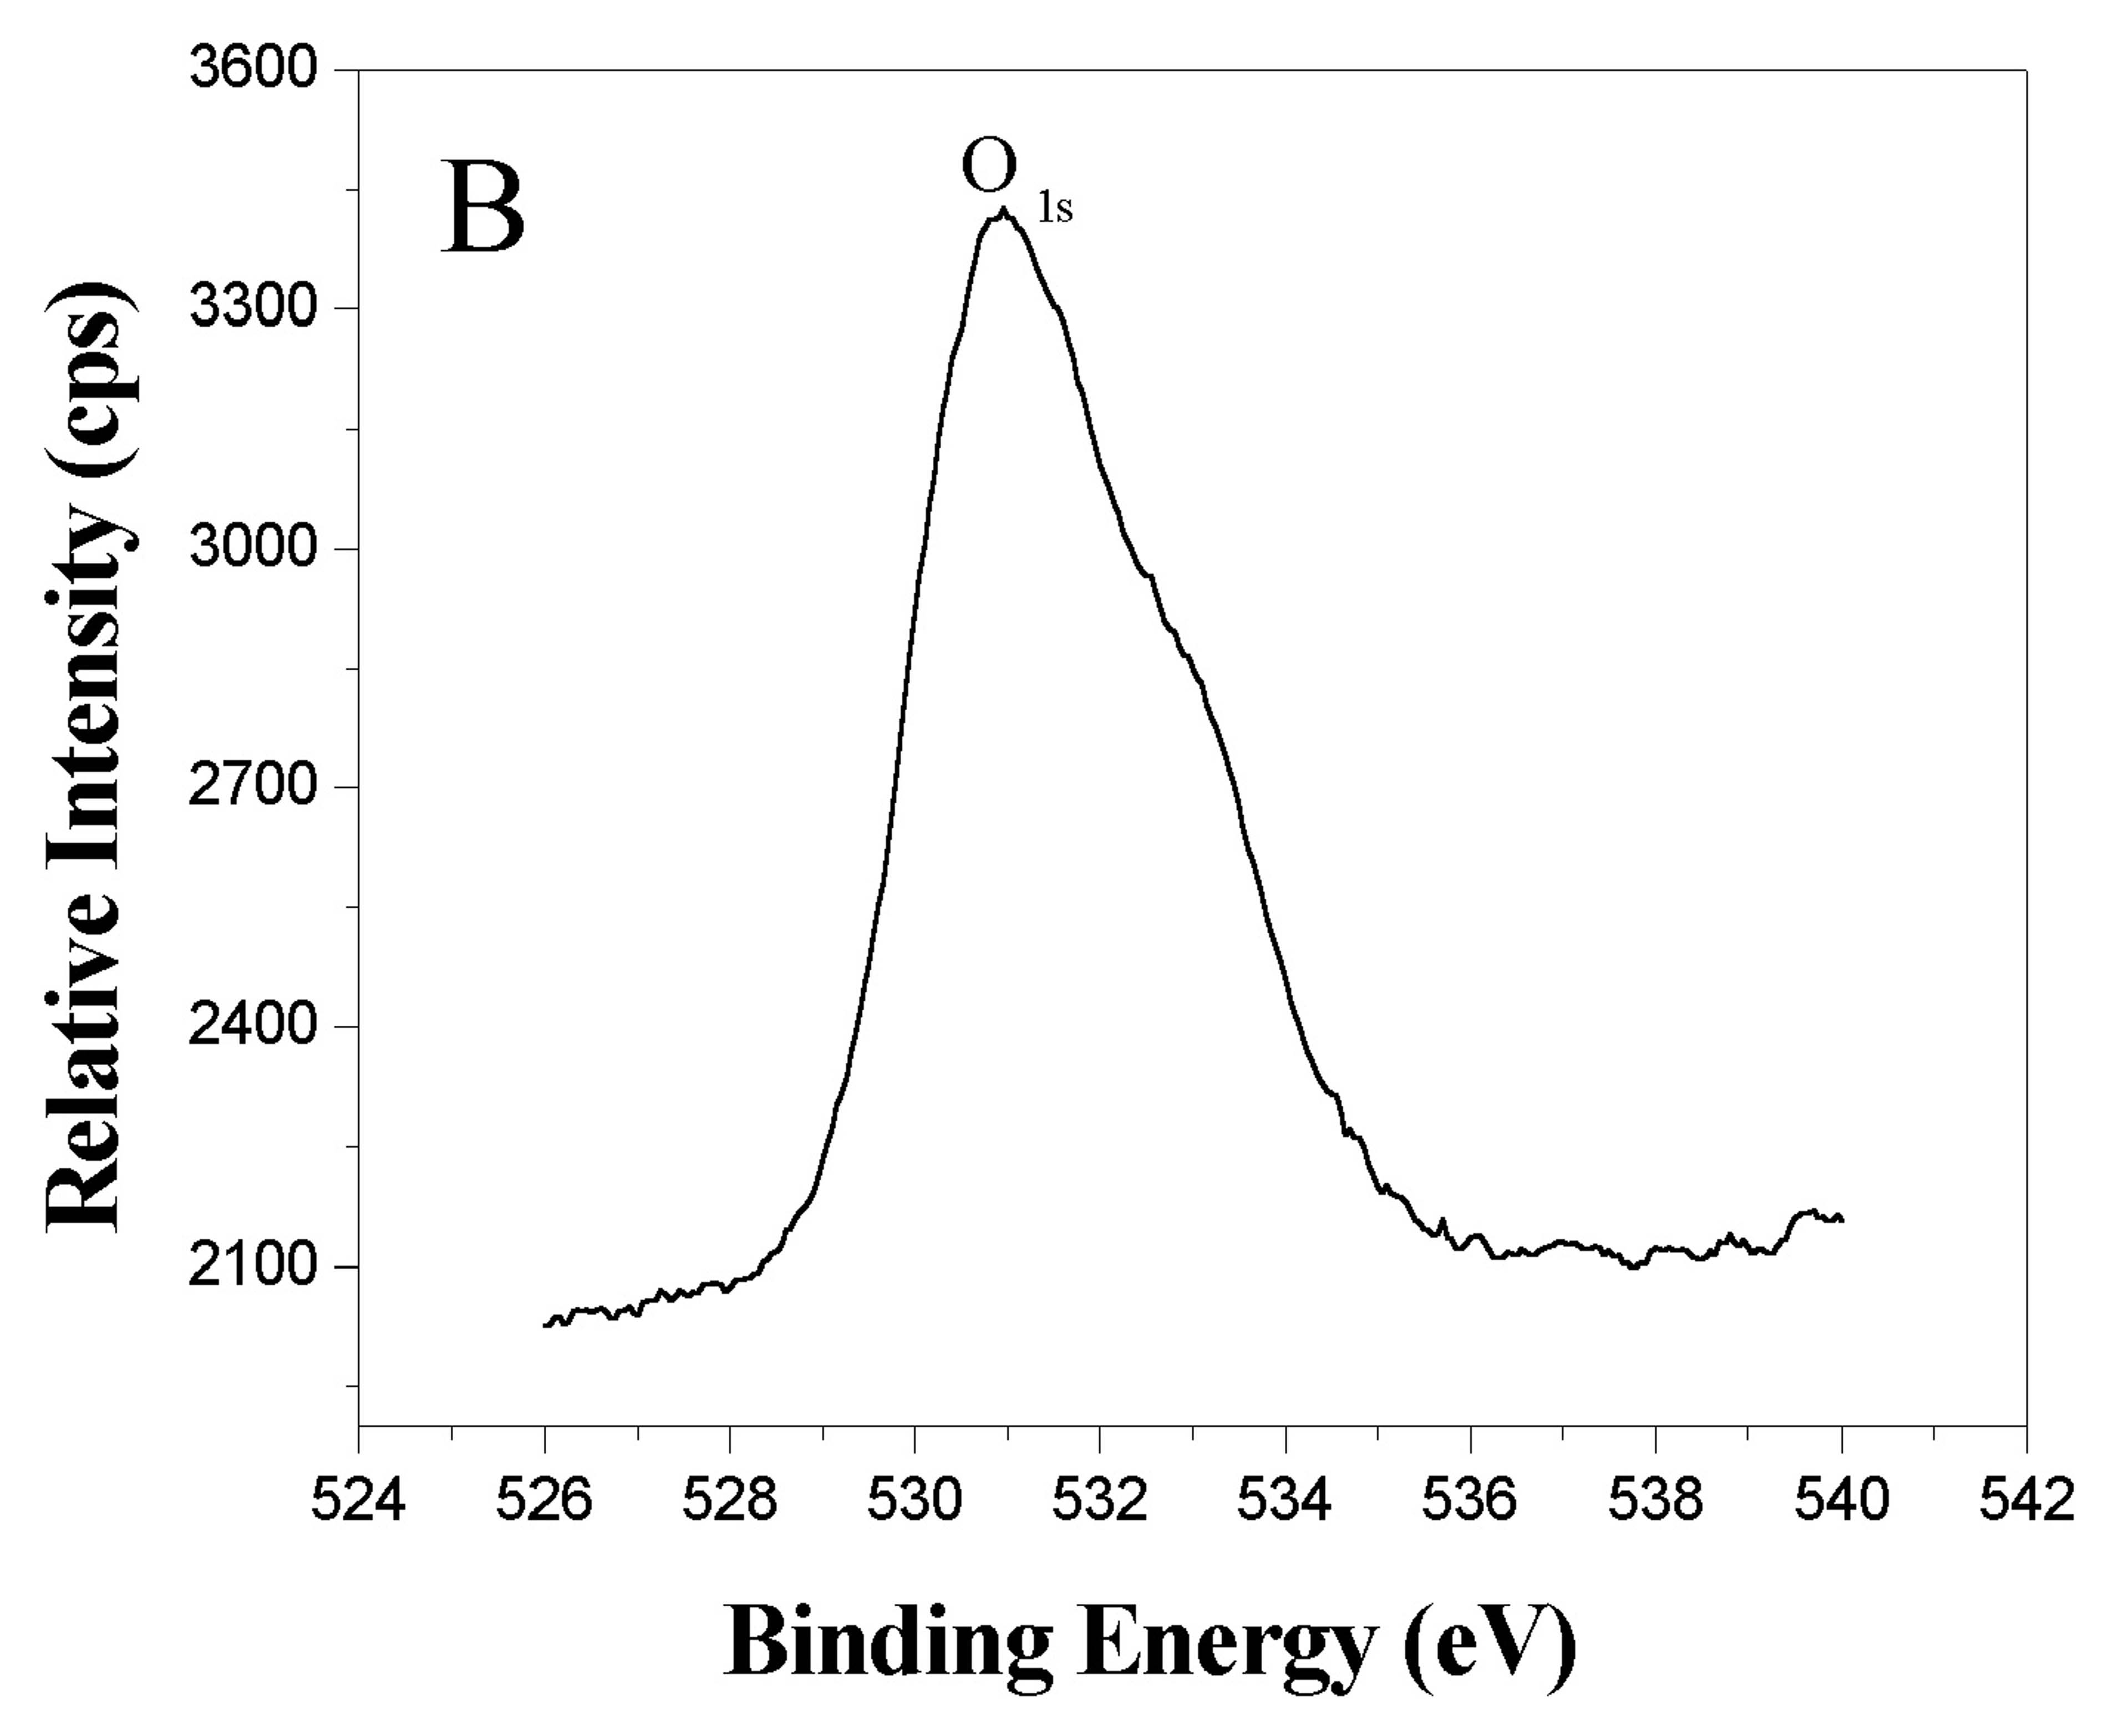


**Fig. 1** XPS analysis of as-obtained products. (A) Zn region; (B) O region.

The energy-dispersive X-ray analysis (EDXA) was recorded on a JEOL-2010 TEM at an acceleration voltage of 200 kV, in which copper meshes were used to containing products. The data were collected from the hollow spheres structures. Element Zn and O can been clearly seen from Fig.2, which shows that the components of the hollow spheres are Zn and O. The ratio of Zn to O can be calculated out approximately to 1:1.08, indicating the products are ZnO hollow spheres. The Cu signals are attributed to the copper meshes.


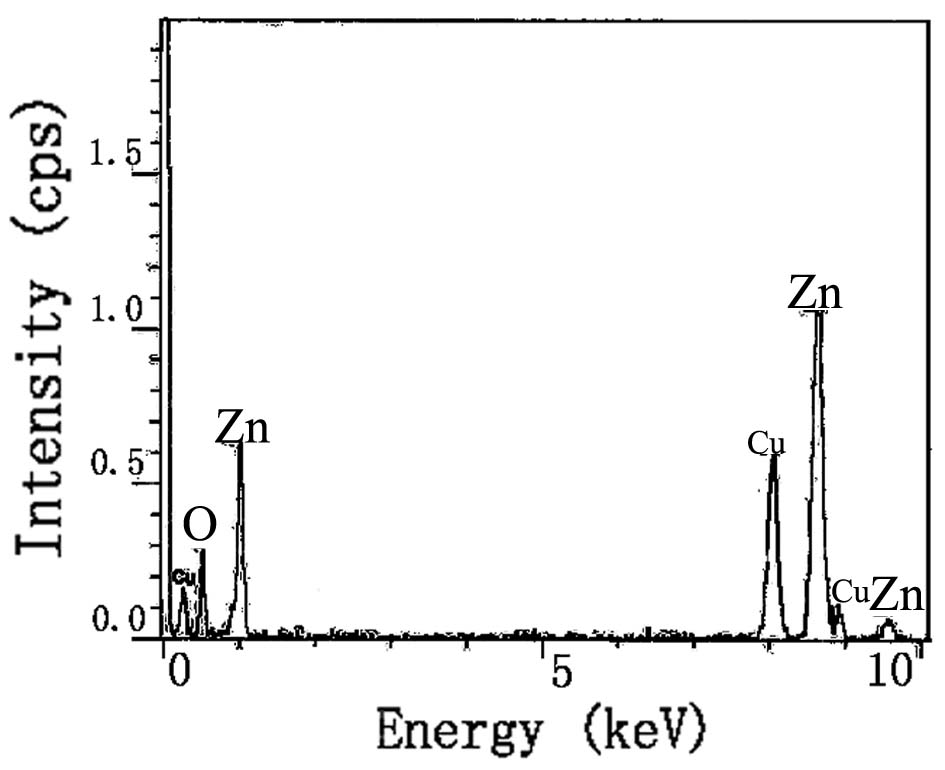


**Fig. 2** EDXA spectrum of ZnO hollow spheres
